# Supplementary material for: Comparative genomic analysis of a naturally born serpentized pig reveals putative mutations related to limb and bone development
Source: PubMed Central journal article supplement (PMC8399796; doi:10.1186/s12864-021-07925-3), 2021-08-28

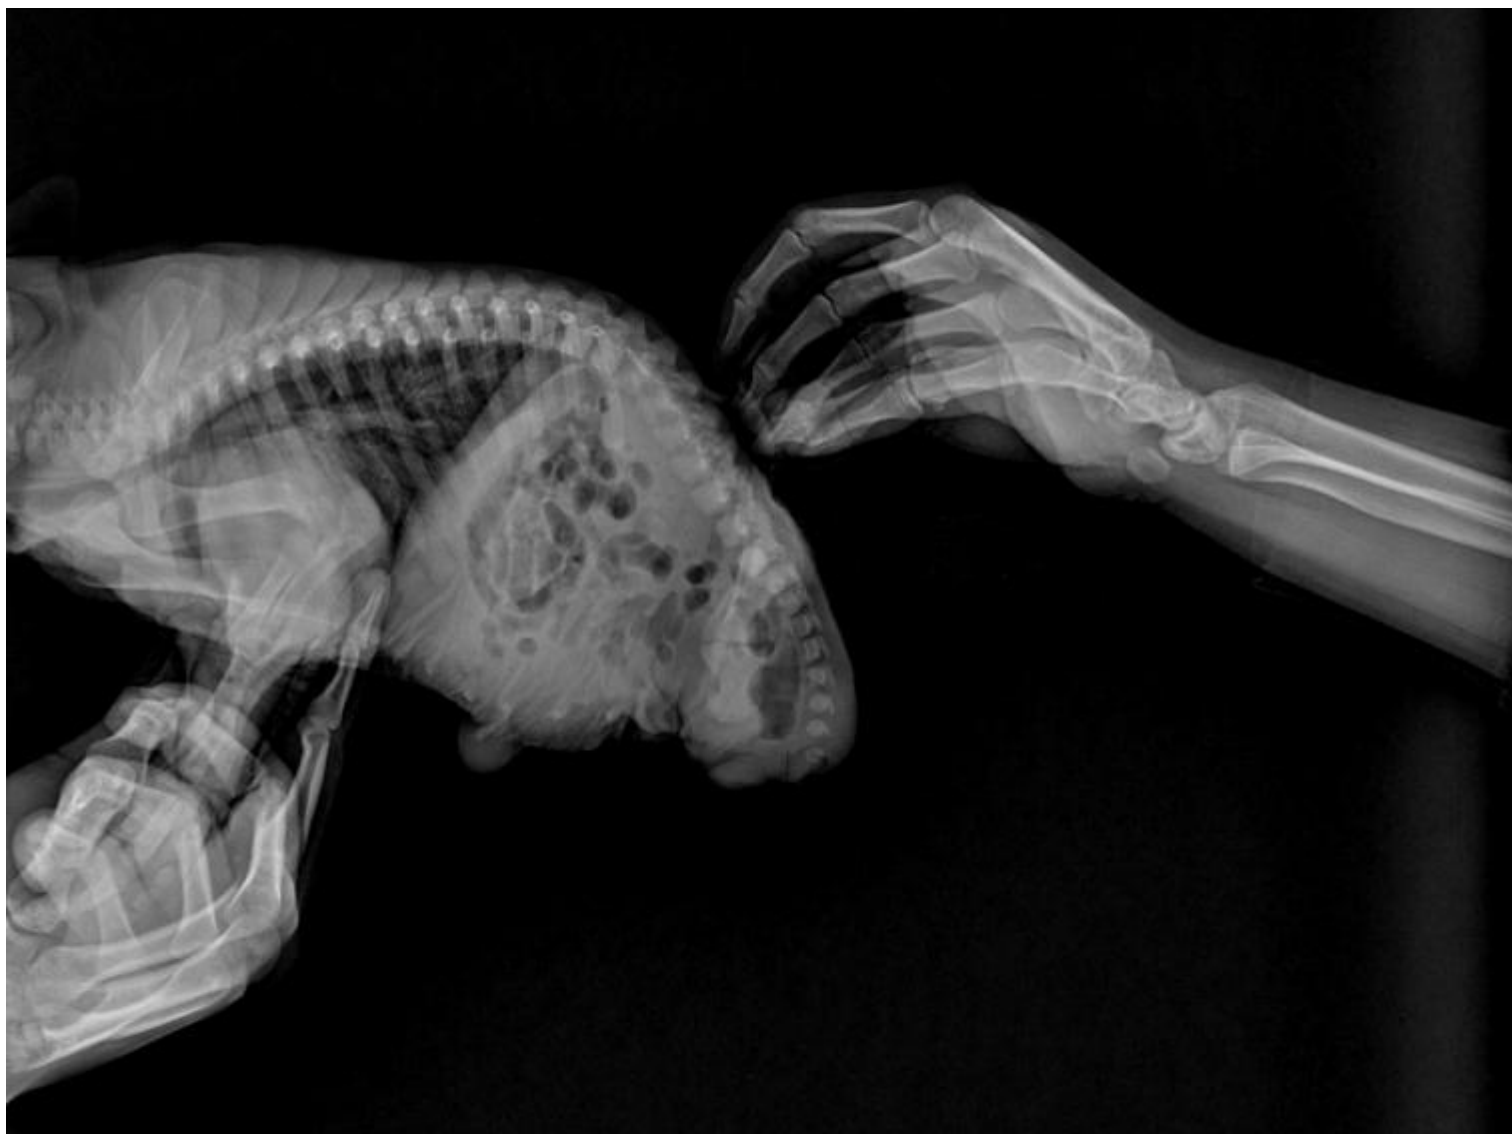

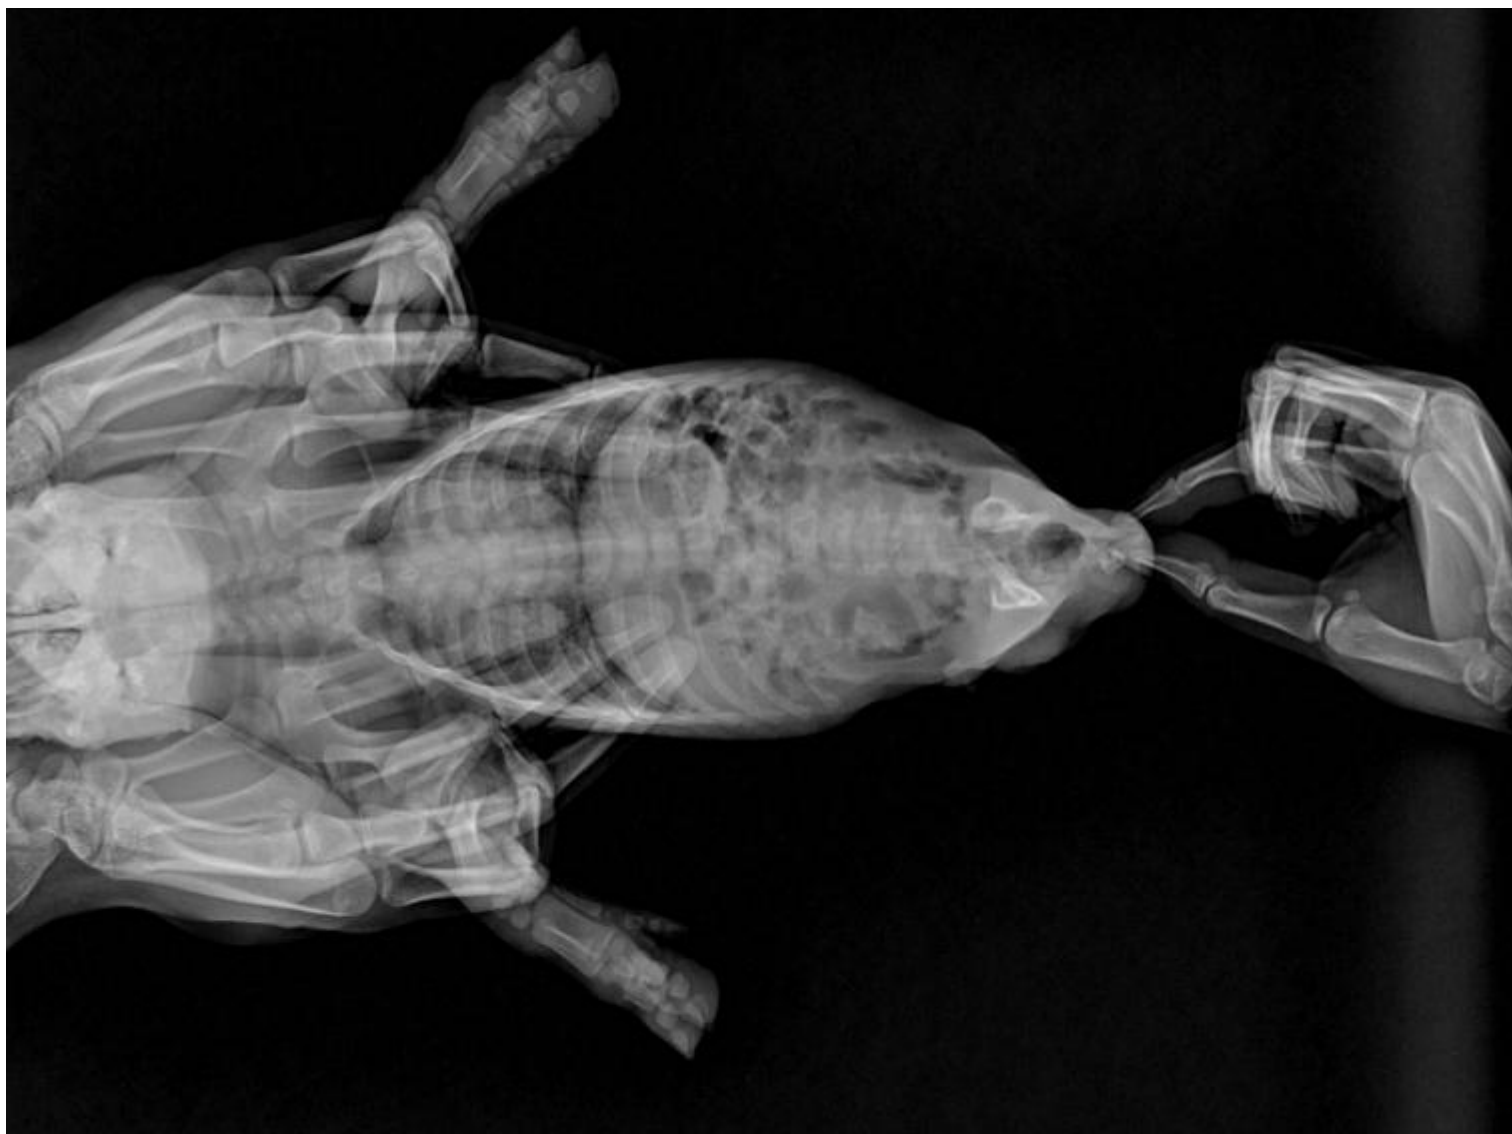

Supplement: 12864_2021_7925_MOESM1_ESM.pdf [file 12864_2021_7925_MOESM1_ESM.pdf]
